# Supplementary material
Source: publisher site journal article supplement (https://www.dovepress.com/article/394283)
Supplement: Supplementary file 1 [file get_supplementary_file.php]

Table S1 The detailed information on MIC for each carbapenem.

| No. | Sites | Pathogens | Minimum inhibitory concentration (mg/L) | | | |
| --- | --- | --- | --- | --- | --- | --- |
| Meropenem | Imipenem | Ertapenem | Tigecycline |
| 1 | Blood, ADF | MDR-EC | ≥16 | ≥16 | ≥8 | 0.5 |
| 2 | BALF | MDR-KP | ≥16 | ≥16 | - | 1 |
| 3 | Urine | XDR-KP | ≥16 | ≥16 | - | 2 |
| 4 | BALF, Blood | MDR-EC | 8 | ≥16 | - | ≤0.5 |
| 5 | BALF | XDR-KP | ≥16 | ≥16 | - | 2 |
| 6 | ADF, Blood | MDR-EC | ≥16 | ≥16 | - | 24 |
| 7 | BALF | MDR-KP | ≥16 | ≥16 | - | 20 |
| 8 | BALF | MDR-KP | ≤1 | ≤1 | 4 | 2 |
| 9 | Blood | XDR-KP | ≥16 | ≥16 | ≥8 | 2 |
| 10 | BALF | XDR-EC | ≥16 | ≥16 | ≥8 | 2 |
| 11 | Blood | MDR-EC | ≥16 | ≥16 | - | ≤0.5 |
| 12 | BALF | XDR-KP | ≥16 | ≥16 | - | 1 |
| 13 | ADF, Blood | MDR-KP | ≥16 | ≥16 | - | 2 |
| 14 | Blood | MDR-KP | ≥16 | ≥16 | - | 2 |
| 15 | BALF | MDR-KP | ≥16 | ≥16 | - | 2 |
| 16 | Blood | MDR-KP | ≥16 | ≥16 | ≥8 | 2 |
| 17 | Blood, BALF | MDR-CF | ≥16 | ≥16 | - | ≤0.5 |
| 18 | CSF | MDR-KP | ≥16 | 8 | - | 2 |
| 19 | Blood | MDR-KP | 8 | ≥16 | - | 2 |
| 20 | Blood, CSF | MDR-EC | ≤1 | 4 | - | 1 |
| 21 | Blood, ADF | XDR-EC | ≥16 | ≥16 | - | ≤0.5 |
| 22 | Blood, BALF | XDR-KP | ≥16 | ≥16 | - | 2 |
| 23 | BALF | MDR-KP | ≥16 | ≥16 | - | 1 |
| 24 | Blood | XDR-EC | ≥16 | ≥16 | - | 2 |
| 25 | Blood | MDR-EC | ≥16 | ≥16 | ≥8 | 2 |
| 26 | BALF | MDR-KP | ≤1 | ≤1 | 2 | 2 |
| 27 | Blood | MDR-KP | 16 | 16 | 8 | 2 |
| 28 | BALF | XDR-KP | ≥16 | ≥16 | ≥8 | 2 |
| 29 | BALF | XDR-KP | 2 | ≥16 | 4 | ≤0.5 |
| 30 | Blood | MDR-EC | ≥16 | ≥16 | - | 2 |
| 31 | Blood | MDR-EC | 2 | 2 | ≥8 | 2 |
| 32 | BALF | MDR-EC | ≥16 | ≥16 | ≥8 | 2 |
| 33 | BALF, Blood | MDR-EC | ≥16 | ≥16 | - | 2 |
| 34 | ADF | MDR-KO | ≥16 | ≥16 | - | ≤0.5 |
| 35 | Blood | MDR-EC | ≥16 | ≥16 | ≤0.5 | 2 |
| 36 | BALF | MDR-RP | ≥16 | 8 | ≥8 | ≤0.5 |
| 37 | BALF | XDR-KP | ≥16 | ≥16 | ≥8 | 2 |
| 38 | BALF, Urine | XDR-KP | ≥16 | ≥16 | - | 2 |
| 39 | BALF | XDR-KP | ≥16 | ≥16 | ≥8 | 2 |
| 40 | Blood | XDR-KP | ≥16 | ≥16 | - | ≤0.5 |
| 41 | BALF, SP | MDR-EC | ≥16 | ≥16 | - | 2 |
| 42 | BALF | MDR-KP | ≥16 | ≥16 | - | 2 |
| 43 | Blood | MDR-KP | 4 | 4 | ≥8 | 1 |
| 44 | Blood | XDR-KP | ≥16 | ≥16 | ≥8 | 2 |
| 45 | BALF | MDR-KP | ≥16 | ≥16 | ≥8 | 2 |
| 46 | Blood, SP | XDR-KP | ≥16 | ≥16 | ≥8 | 2 |
| 47 | BALF | XDR-KP | ≥16 | ≥16 | - | 1 |
| 48 | Blood | MDR-KP | ≥16 | ≥16 | ≥8 | 2 |
| 49 | Blood | MDR-KP | ≥16 | ≥16 | ≥8 | 2 |
| 50 | BALF | MDR-KP | ≥16 | ≥16 | ≥8 | 2 |
| 51 | Blood | MDR-KP | ≥16 | ≥16 | ≥8 | 2 |
| 52 | SP | MDR-KP | ≥16 | ≥16 | - | 2 |
| 53 | BALF | MDR-KP | ≥16 | ≥16 | - | ≤0.5 |
| 54 | Blood | MDR-EC | >8 | ≥16 | 8 | ≤0.5 |
| 55 | Blood | MDR-KP | ≥16 | ≥16 | ≥8 | 2 |
| 56 | BALF | MDR-KP | ≥16 | ≥16 | - | 1 |

CSF, cerebrospinal fluid; ADF, abdominal drainage fluid; SP, pus from skin; KP, *Klebsiella pneumoniae*; EC, *Escherichia coli*; KO, *Klebsiella oxytoca*; CF, *Citrobacter freundii*; RP, *Raoultella planticola*; MDR, multiple drug resistance; XDR, extensively drug resistance.

Table S2 Patient characteristics.

| Characteristic | Infection-related deceased  (n = 25) | Others  (n = 31) | *P* |
| --- | --- | --- | --- |
| Age (year) | 11.2 (8.6-12.6) | 6.3 (2.2-10.8) | 0.045 |
| Weight (kg) | 34.0 (22.0-42.0) | 19.5 (122.0-40.0) | 0.101 |
| Male (%) | 20 (80.0%) | 19 (61.3%) | 0.130 |
| PCIS | 84.0 (78.0-88.0) | 92.0 (86.0-96.0) | <0.001 |
| PIM3 score | -2.4 (-3.0- -1.6) | -2.8 (-4.2- -2.1) | 0.132 |
| Probability of death | 8.4 (4.6-16.4) | 5.5 (1.5-10.4) | 0.132 |
| PRISM III | 15.0 (12.0-18.0) | 8.5 (5.0-12.0) | 0.001 |
| Septic shock, n (%) | 6 (24.0%) | 7 (22.6%) | 0.900 |
| MODS, n (%) | 11 (44.0%) | 7 (22.6%) | 0.088 |
| Mechanical ventilation, n (%) | 7 (28.0%) | 13 (41.9%) | 0.279 |
| CPR, n (%) | 4 (16.0%) | 4 (12.9%) | 0.742 |
| Surgery, n (%) | 5 (20.0%) | 5 (16.1%) | 0.738 |
| Underlying disease, n (%) |  |  |  |
| Hematological system disease | 17 (68.0%) | 12 (38.7%) | 0.029 |
| Accidental injury | 1 (4.0%) | 7 (22.6%) | 0.063 |
| Congenital malformation | 1 (4.0%) | 6 (19.4%) | 0.084 |
| Immunodeficiency | 1 (4.0%) | 2 (6.5%) | 0.686 |
| Others | 5 (20.0%) | 4 (12.9%) | 0.472 |
| Immunosuppression, n (%) | 20 (80.0%) | 18 (58.1%) | 0.081 |
| Invasive procedures, n (%) |  |  |  |
| Central venous catheterization | 17 (68.0%) | 23 (74.2%) | 0.610 |
| Urinary catheterization | 10 (40.0%) | 17 (54.8%) | 0.269 |
| Gastric catheterization | 12 (48.0%) | 21 (67.7%) | 0.135 |
| Infection sites, n=68(%) |  |  |  |
| Bloodstream | 16 (64.0%) | 13 (41.9%) | 0.100 |
| Pulmonary | 9 (36.0%) | 18 (58.1%) | 0.100 |
| Intraperitoneal | 1 (4.0%) | 4 (12.9%) | 0.245 |
| Others | 4 (16.0%) | 3 (9.7%) | 0.477 |
| Meropenem MIC (mg/L) |  |  |  |
| ≥ 16 | 22 (88.0%) | 26 (83.9%) | 0.893 |
| 4-8 | 1 (4.0%) | 2 (6.5%) |
| ≤2 | 2 (8.0%) | 3 (9.7%) |
| Multi-site infection, n (%) | 5 (20.0%) | 7 (22.6%) | 0.815 |
| Serum albumin | 27.9 (25.2-32.8) | 34.3 (31.0-38.6) | <0.001 |
| Creatinine | 37.0 (25.0-55.0) | 20.0 (14.0-33.0) | 0.002 |
| Lactate dehydrogenase | 432.0(223.0-864.0) | 291.0(162.0-637.0) | 0.219 |
| Alamine aminotransferase | 45.0 (17.0-70.0) | 36.0 (21.0-58.0) | 0.674 |
| Total bilirubin | 17.7 (9.5-66.8) | 13.4 (6.2-32.7) | 0.213 |
| White blood cells | 0.8 (0.2-6.76) | 9.2 (0.3-13.2) | 0.082 |
| Hemoglobin | 79.4 (71.0-93.7) | 89.0 (75.0-97.0) | 0.154 |
| Platelet | 18.0 (5.0-71.0) | 143.0 (30.0-270.0) | 0.002 |
| C-reactive protein | 172.7(114.1-200.0) | 96.3 (39.5-164.8) | 0.067 |
| Procalcitonin | 5.8 (1.2-17.5) | 0.9 (0.3-3.2) | 0.009 |

Categorical variables were presented as numbers (%), and continuous variables were presented as median (interquartile ranges). PCIS: pediatric critical illness score; PIM, paediatric index of mortality; PRISM, pediatric risk of mortality score; MODS, multiple organ dysfunction syndrome; CPR, cardiopulmonary resuscitation.


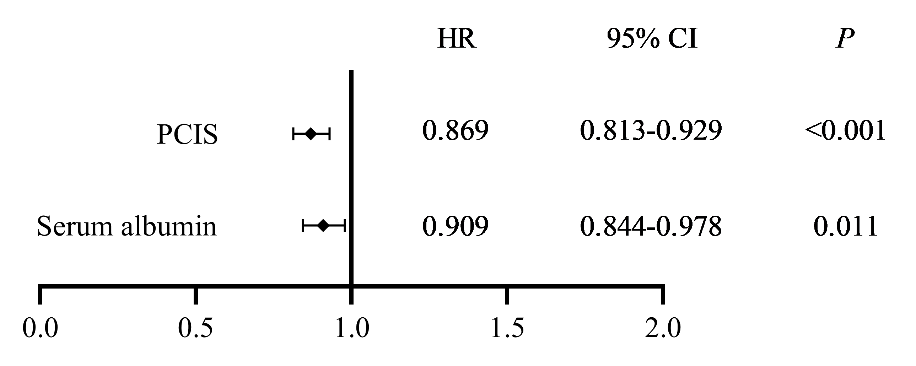


**Figure S1.** Cox regression of factors associated with infection related mortality within 30 days. HR, hazard ratio; CI, confidence interval; PCIS, pediatric critical illness score.
